# Supplementary material for: Periodic DFT study of the donor interactions with the MgCl2surface in the Ziegler–Natta catalytic system
Source: Royal Society of Chemistry journal article supplement (doi:10.1039/c5ra25362d), 2016-01-01
Supplement: c5ra25362d1.pdf [file c5ra25362d1.pdf]

## Supporting Information

For

### **Periodic DFT Study of the Donor Interactions with the MgCl<sub>2</sub> Surface in the Ziegler-Natta Catalytic System**

Kefeng Xie<sup>a,b</sup>, Bochao Zhu<sup>b</sup>, Renwei Xu<sup>b</sup>, Jingcheng Xu<sup>c</sup>, Peng Liu<sup>a,\*</sup>

<sup>a</sup>College of Chemistry and Chemical Engineering, Lanzhou University, Lanzhou, 730000, China

<sup>b</sup>Lanzhou Petrochemical Research Center, Petrochina, Lanzhou, 730060, China

<sup>c</sup>School of Materials Science and Engineering, University of Shanghai for Science and Technology, Shanghai, 200093, China

Email: [pliu@lzu.edu.cn](mailto:pliu@lzu.edu.cn)

#### **Table of contents**

1. The figures of the optimized structures.

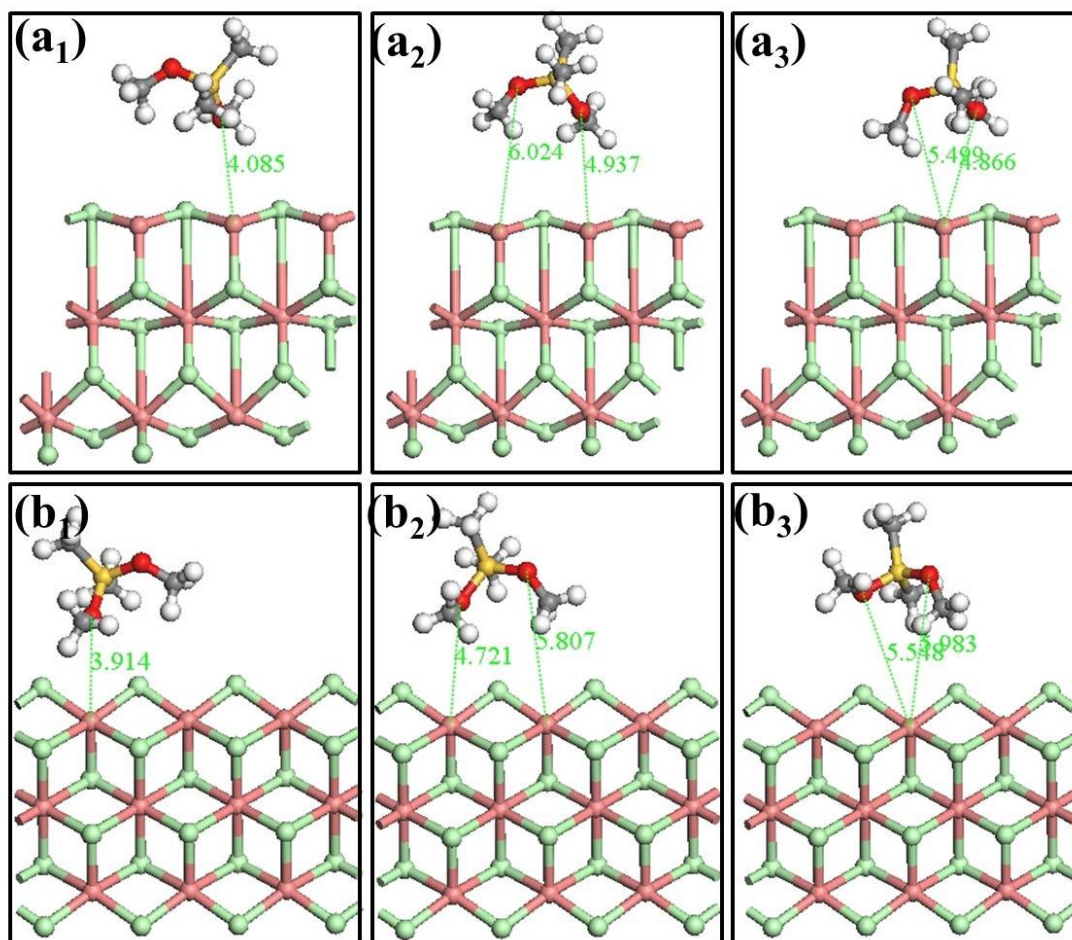

Fig. S1 Optimized structures of DMDS/ $\alpha$ -MgCl<sub>2</sub> (100) complexes, a<sub>1~3</sub> is tri-coordinate, b<sub>1~3</sub> is five-coordinate.

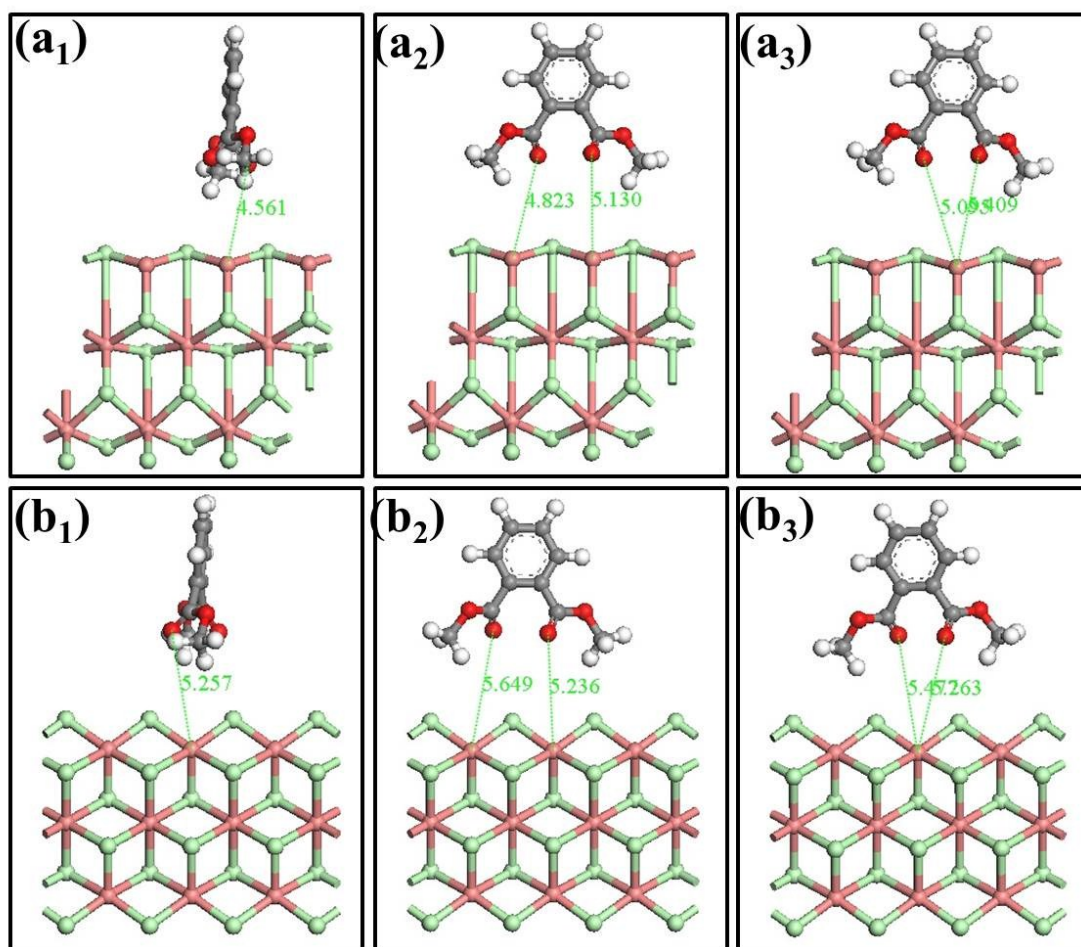

Fig. S2 Optimized structures of DMP/ $\alpha$ -MgCl<sub>2</sub> (100) complexes, a<sub>1~3</sub> is tri-coordinate, b<sub>1~3</sub> is five-coordinate.

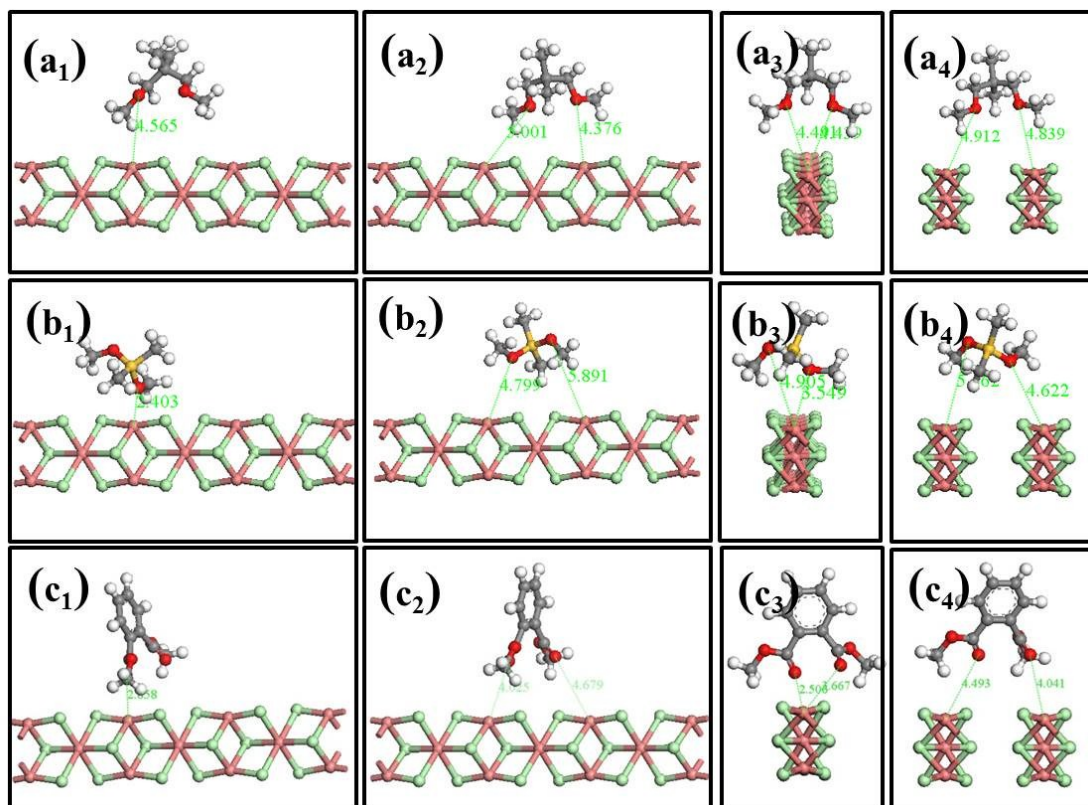

Fig. S3 Optimized structures of DMDP/ $\beta$ -MgCl<sub>2</sub> (110), DMDS/ $\beta$ -MgCl<sub>2</sub> (110), and DMP/ $\beta$ -MgCl<sub>2</sub> (110) complexes: Mono-coordination (a<sub>1</sub>, b<sub>1</sub>, c<sub>1</sub>), bridge coordination (a<sub>2</sub>, b<sub>2</sub>, c<sub>2</sub>), chelate coordination (a<sub>3</sub>, b<sub>3</sub>, c<sub>3</sub>), and zip coordination (a<sub>4</sub>, b<sub>4</sub>, c<sub>4</sub>) modes.

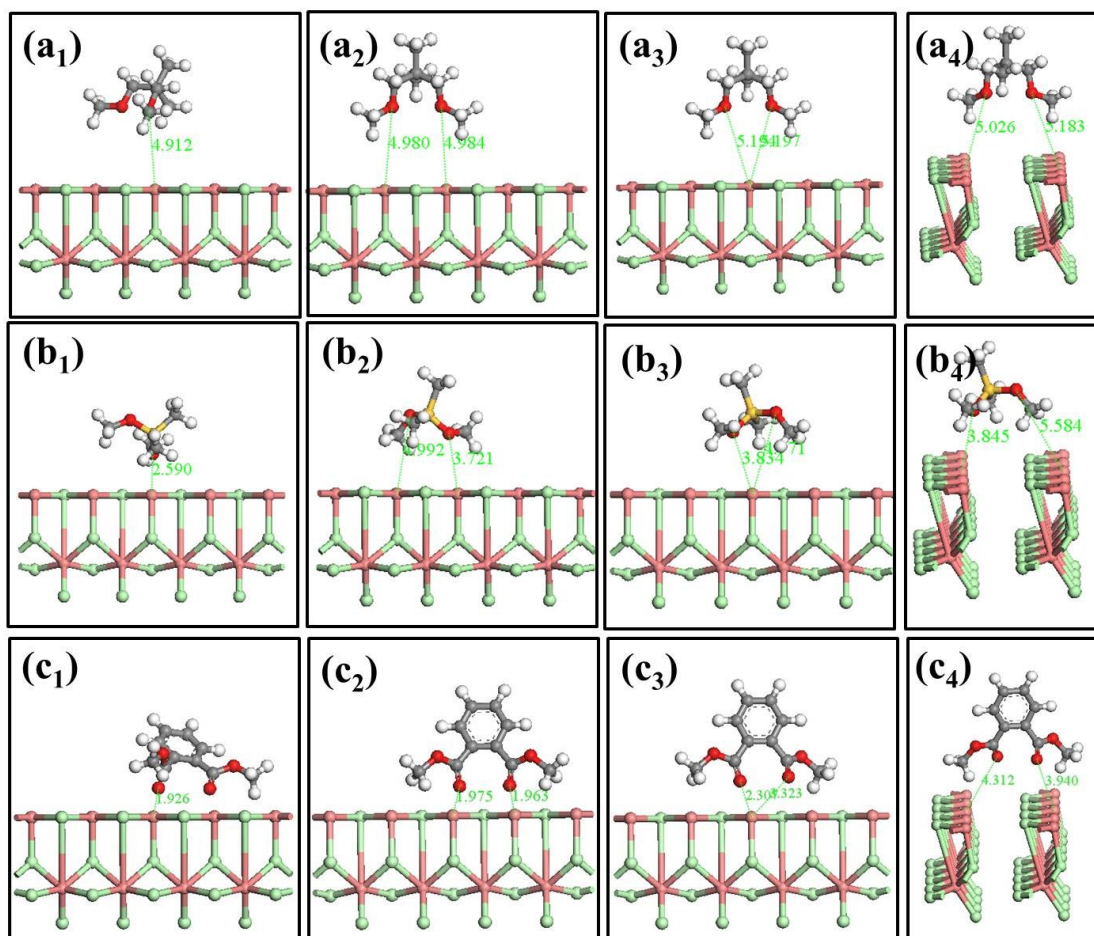

Fig. S4 Optimized structures of DMDP/ $\beta$ -MgCl<sub>2</sub> (100) (a<sub>1</sub>~<sub>4</sub>), DMDS/ $\beta$ -MgCl<sub>2</sub> (100) (b<sub>1</sub>~<sub>4</sub>) and DMP/ $\beta$ -MgCl<sub>2</sub> (100) (c<sub>1</sub>~<sub>4</sub>) complexes.
